# Supplementary material
Source: PubMed Central journal article supplement (PMC2934651)
Supplement: supp_M110.143859_jbc.M110.143859-1.pdf [file supp_M110.143859_jbc.M110.143859-1.pdf]

SUPPLEMENTAL DATA

**Supplemental Data Table 1.** Bacterial strains and plasmids used in the experiment.

| Strains or Plasmids               | Description                                                                                                                                                                                                                                   | Reference                     |
|-----------------------------------|-----------------------------------------------------------------------------------------------------------------------------------------------------------------------------------------------------------------------------------------------|-------------------------------|
| <b>Strains</b>                    |                                                                                                                                                                                                                                               |                               |
| <i>Francisella tularensis</i> LVS | Pm <sup>r</sup> , Live vaccine strain                                                                                                                                                                                                         | USAMRIID, Frederick, MD       |
| <i>Escherichia coli</i> DH5a      | F ( $\phi$ 80 $\Delta$ lacZ vM15) <i>recA1 endA1 gyrA96 thi-1 hsdR17(r<sup>k</sup>) M<sup>r</sup>k</i> ) <i>supE44 relA1 deoR <math>\Delta</math>(lacZYA-argF) U169</i>                                                                       | 63                            |
| <i>Shigella dysenteriae</i> sd197 | <i>S. dysenteriae</i> serotype 1                                                                                                                                                                                                              | MGH <sup>a</sup> , Boston, MA |
| <i>Ft.LVS::wbtA</i>               | Pm <sup>r</sup> Km <sup>r</sup> , Live vaccine strain ; $\Delta$ wbtA                                                                                                                                                                         | 31                            |
| <i>Ft.LVS::wzy</i>                | Pm <sup>r</sup> , Live vaccine strain ; $\Delta$ wzy                                                                                                                                                                                          | This study                    |
| <i>Ft.LVS::wzy/pTH21</i>          | Pm <sup>r</sup> , Live vaccine strain ; $\Delta$ wzy harboring pTH21                                                                                                                                                                          | This study                    |
| <i>Ft.LVS::wzy/pTH33</i>          | Pm <sup>r</sup> , Live vaccine strain ; $\Delta$ wzy harboring pTH33                                                                                                                                                                          | This study                    |
| <b>Plasmids</b>                   |                                                                                                                                                                                                                                               |                               |
| pEX18Tc                           | 6.3-kb; Tc <sup>r</sup> ; <i>oriT<sup>+</sup> sacB<sup>+</sup></i> , gene replacement vector with MCS from pUC18                                                                                                                              | 64                            |
| pEX18Km                           | 6.8-kb; Km <sup>r</sup> ; <i>oriT<sup>+</sup> sacB<sup>+</sup></i> , gene replacement vector with MCS from pUC18                                                                                                                              | This study                    |
| pPV                               | Ap <sup>r</sup> , Cm <sup>r</sup> , <i>sacB</i> , <i>mob</i>                                                                                                                                                                                  | 38                            |
| pFNLTP6                           | 6.9-kb; pFNLTP1 derivative with <i>NdeI</i> , <i>EcoRI</i> , <i>SmaI</i> , <i>NotI</i> , <i>NheI</i> , and <i>XhoI</i> restriction enzyme sites (MCS2) cloned between the <i>KpnI</i> and <i>BamHI</i> sites; km <sup>r</sup> Ap <sup>r</sup> | 65                            |
| pCR2.1 TOPO                       | 3.9-kb; plasmid for cloning PCR product, km <sup>r</sup> Ap <sup>r</sup>                                                                                                                                                                      | Invitrogen, Carlsbad, CA      |
| pTH30                             | 11.4-kb; pEX18Km harboring <i>sacB</i> (from pPV) and upstream and downstream of <i>wzy</i>                                                                                                                                                   | This study                    |
| pTH17                             | 7.1-kb; pFNLTP6 harboring P <sub>groEL</sub>                                                                                                                                                                                                  | This study                    |
| pTH21                             | 8.3-kb; pFNLTP6 harboring P <sub>groEL::WZY</sub>                                                                                                                                                                                             | This study                    |
| pTH33                             | 8.3-kb; pFNLTP6 harboring P <sub>groEL::WZYshigella</sub>                                                                                                                                                                                     | This study                    |
| pE25A                             | 8.1-kb; pFNLTP6 harboring P <sub>groEL::WZYE25A</sub>                                                                                                                                                                                         | This study                    |
| pK27A                             | 8.1-kb; pFNLTP6 harboring P <sub>groEL::WZYK27A</sub>                                                                                                                                                                                         | This study                    |
| pD52A                             | 8.1-kb; pFNLTP6 harboring P <sub>groEL::WZYD52A</sub>                                                                                                                                                                                         | This study                    |
| pD144A                            | 8.1-kb; pFNLTP6 harboring P <sub>groEL::WZYD144A</sub>                                                                                                                                                                                        | This study                    |
| pK152A                            | 8.1-kb; pFNLTP6 harboring P <sub>groEL::WZYK152A</sub>                                                                                                                                                                                        | This study                    |
| pK153A                            | 8.1-kb; pFNLTP6 harboring P <sub>groEL::WZYK153A</sub>                                                                                                                                                                                        | This study                    |
| pE157A                            | 8.1-kb; pFNLTP6 harboring P <sub>groEL::WZYE157A</sub>                                                                                                                                                                                        | This study                    |
| pE163A                            | 8.1-kb; pFNLTP6 harboring P <sub>groEL::WZYE163A</sub>                                                                                                                                                                                        | This study                    |
| pK165A                            | 8.1-kb; pFNLTP6 harboring P <sub>groEL::WZYK165A</sub>                                                                                                                                                                                        | This study                    |
| pR167A                            | 8.1-kb; pFNLTP6 harboring P <sub>groEL::WZYR167A</sub>                                                                                                                                                                                        | This study                    |
| pD177A                            | 8.1-kb; pFNLTP6 harboring P <sub>groEL::WZYD177A</sub>                                                                                                                                                                                        | This study                    |
| pE277A                            | 8.1-kb; pFNLTP6 harboring P <sub>groEL::WZYE277A</sub>                                                                                                                                                                                        | This study                    |
| pD287A                            | 8.1-kb; pFNLTP6 harboring P <sub>groEL::WZYD287A</sub>                                                                                                                                                                                        | This study                    |
| pH290A                            | 8.1-kb; pFNLTP6 harboring P <sub>groEL::WZYH290A</sub>                                                                                                                                                                                        | This study                    |
| pK399A                            | 8.1-kb; pFNLTP6 harboring P <sub>groEL::WZYK399A</sub>                                                                                                                                                                                        | This study                    |
| pE400A                            | 8.1-kb; pFNLTP6 harboring P <sub>groEL::WZYE400A</sub>                                                                                                                                                                                        | This study                    |
| pR406A                            | 8.1-kb; pFNLTP6 harboring P <sub>groEL::WZYR406A</sub>                                                                                                                                                                                        | This study                    |
| pK399A                            | 8.1-kb; pFNLTP6 harboring P <sub>groEL::WZYK399A</sub>                                                                                                                                                                                        | This study                    |
| pG176A                            | 8.1-kb; pFNLTP6 harboring P <sub>groEL::WZYG176A</sub>                                                                                                                                                                                        | This study                    |
| pG176E                            | 8.1-kb; pFNLTP6 harboring P <sub>groEL::WZYG176E</sub>                                                                                                                                                                                        | This study                    |
| pG176S                            | 8.1-kb; pFNLTP6 harboring P <sub>groEL::WZYG176S</sub>                                                                                                                                                                                        | This study                    |
| pG176K                            | 8.1-kb; pFNLTP6 harboring P <sub>groEL::WZYG176K</sub>                                                                                                                                                                                        | This study                    |
| pD177S                            | 8.1-kb; pFNLTP6 harboring P <sub>groEL::WZYD177S</sub>                                                                                                                                                                                        | This study                    |
| pD177E                            | 8.1-kb; pFNLTP6 harboring P <sub>groEL::WZYD177E</sub>                                                                                                                                                                                        | This study                    |
| pD177K                            | 8.1-kb; pFNLTP6 harboring P <sub>groEL::WZYD177K</sub>                                                                                                                                                                                        | This study                    |
| pG178A                            | 8.1-kb; pFNLTP6 harboring P <sub>groEL::WZYG178A</sub>                                                                                                                                                                                        | This study                    |
| pG178S                            | 8.1-kb; pFNLTP6 harboring P <sub>groEL::WZYG178S</sub>                                                                                                                                                                                        | This study                    |
| pG178E                            | 8.1-kb; pFNLTP6 harboring P <sub>groEL::WZYG178E</sub>                                                                                                                                                                                        | This study                    |
| pG323A                            | 8.1-kb; pFNLTP6 harboring P <sub>groEL::WZYG323A</sub>                                                                                                                                                                                        | This study                    |
| pG323S                            | 8.1-kb; pFNLTP6 harboring P <sub>groEL::WZYG323S</sub>                                                                                                                                                                                        | This study                    |
| pG323E                            | 8.1-kb; pFNLTP6 harboring P <sub>groEL::WZYG323E</sub>                                                                                                                                                                                        | This study                    |
| pG323R                            | 8.1-kb; pFNLTP6 harboring P <sub>groEL::WZYG323R</sub>                                                                                                                                                                                        | This study                    |
| pG323A                            | 8.1-kb; pFNLTP6 harboring P <sub>groEL::WZYG324A</sub>                                                                                                                                                                                        | This study                    |
| pG323E                            | 8.1-kb; pFNLTP6 harboring P <sub>groEL::WZYG324E</sub>                                                                                                                                                                                        | This study                    |
| wzy-gfp                           | 8.9-kb; pFNLTP6 harboring <i>wzy::gfp</i>                                                                                                                                                                                                     | This study                    |
| P-gfp                             | 7.8-kb; pFNLTP6 harboring P <sub>groEL::gfp</sub>                                                                                                                                                                                             | This study                    |
| P-wzy-gfp                         | 9.1-kb; pFNLTP6 harboring P <sub>groEL::WZY::gfp</sub>                                                                                                                                                                                        | This study                    |
| P-wzy (G <sub>176E</sub> )-gfp    | 9.1-kb; pFNLTP6 harboring P <sub>groEL::WZY(G<sub>176E</sub>)::gfp</sub>                                                                                                                                                                      | This study                    |
| P-wzy (D <sub>177A</sub> )-gfp    | 9.1-kb; pFNLTP6 harboring P <sub>groEL::WZY(D<sub>177A</sub>)::gfp</sub>                                                                                                                                                                      | This study                    |
| P-wzy (G <sub>323E</sub> )-gfp    | 9.1-kb; pFNLTP6 harboring P <sub>groEL::WZY(G<sub>323E</sub>)::gfp</sub>                                                                                                                                                                      | This study                    |
| P-wzy (Y <sub>324E</sub> )-gfp    | 9.1-kb; pFNLTP6 harboring P <sub>groEL::WZY(Y<sub>324E</sub>)::gfp</sub>                                                                                                                                                                      | This study                    |
| P-wzy (K <sub>152A</sub> )-gfp    | 9.1-kb; pFNLTP6 harboring P <sub>groEL::WZY(K<sub>152A</sub>)::gfp</sub>                                                                                                                                                                      | This study                    |

a, Massachusetts General Hospital, Boston MA

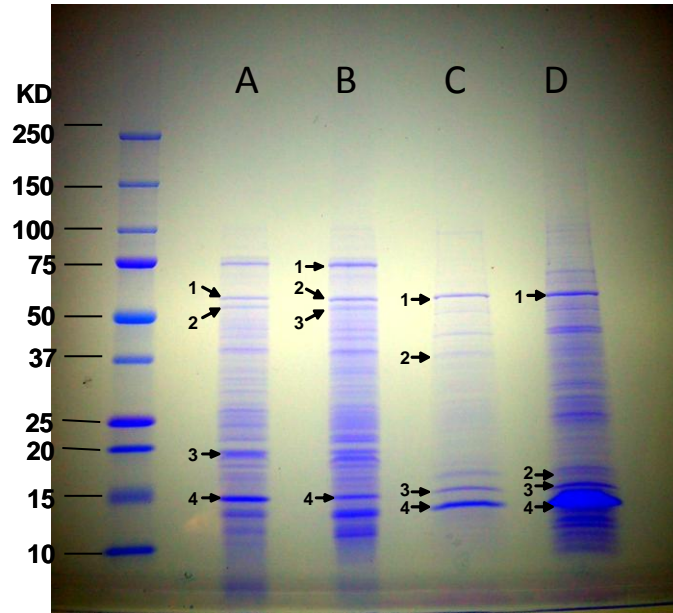

| Identified proteins from MASS Spec. analysis  | Predicted subcellular location | Presence of identified proteins in each lane |               |                    |                    |
|-----------------------------------------------|--------------------------------|----------------------------------------------|---------------|--------------------|--------------------|
|                                               |                                | A (periplasm)                                | B (periplasm) | C (outer membrane) | D (outer membrane) |
| <i>peroxidase/catalase</i>                    | Periplasm <sup>66</sup>        | ○ (A-1)                                      | ○ (B-2)       | × (C-1)            | × (D-1)            |
| <i>peroxiredoxin, AhpC-TSA family protein</i> | Periplasm <sup>67</sup>        | ○ (A-4)                                      | ○ (B-4)       | × (C-3)            | × (D-3)            |
| <i>outer membrane protein OmpH</i>            | Outer Membrane <sup>68</sup>   | × (A-4)                                      | × (B-4)       | ○ (C-3)            | ○ (D-3)            |
| <i>outer membrane lipoprotein blc</i>         | Outer Membrane <sup>69</sup>   | × (A-4)                                      | × (B-4)       | ○ (C-3)            | ○ (D-3)            |
| <i>17KDa outer membrane protein</i>           | Outer membrane <sup>70</sup>   | × (A-4)                                      | × (B-4)       | ○ (C-3)            | ○ (D-3)            |

○ - presence (of the protein in lane), × - no presence (of the protein in lane) A: *Ft.LVS.wt* (periplasm); B: *Ft.LVS::wzy* (periplasm); C: *Ft.LVS.wt* (outer membrane) ; D: *Ft.LVS::wzy* (outer membrane) ;

**Supplemental Data Figure 1.** Mass spectrometry analysis of proteins located in subcellular fractions. The isolated subcellular fractions were analyzed by SDS-PAGE gel (4-20% gradient gel) and 4 randomly chosen protein bands in each fraction was analyzed by Mass spectrometry to identify the proteins and predict their subcellular locations. The table shows the fraction-specific protein distribution in SDS-PAGE gel bands from the periplasmic and outer membrane fraction. Although they have the same MW, different proteins are found in each fraction indicating the purity of the fractions. For example, peroxidase/catalase, which is a periplasmic protein, was only detected in A-1 and B-2 (periplasmic fraction bands), but not in the C-1 and D-1 band which are collected from the outer membrane fractions even though these four bands are the same MW).

| Predicted Subcellular Location         | Presence in the lane after MS spec analysis |                     |                      |                      |                         |                     |                      |                      |   |
|----------------------------------------|---------------------------------------------|---------------------|----------------------|----------------------|-------------------------|---------------------|----------------------|----------------------|---|
|                                        | Periplasmic fraction                        |                     |                      |                      | Outer membrane fraction |                     |                      |                      |   |
|                                        | a                                           | b                   | c                    | d                    | e                       | f                   | g                    | h                    |   |
|                                        | 20 $\mu\text{g/ml}$                         | 20 $\mu\text{g/ml}$ | 0.2 $\mu\text{g/ml}$ | 0.2 $\mu\text{g/ml}$ | 20 $\mu\text{g/ml}$     | 20 $\mu\text{g/ml}$ | 0.2 $\mu\text{g/ml}$ | 0.2 $\mu\text{g/ml}$ |   |
| peroxiredoxin, AhpC-TSA family protein | Periplasm                                   | ○                   | ○                    | ○                    | ○                       | ×                   | ×                    | ×                    | × |
| 17kDa outer membrane protein           | Outer membrane                              | ×                   | ×                    | ×                    | ×                       | ○                   | ○                    | ○                    | ○ |

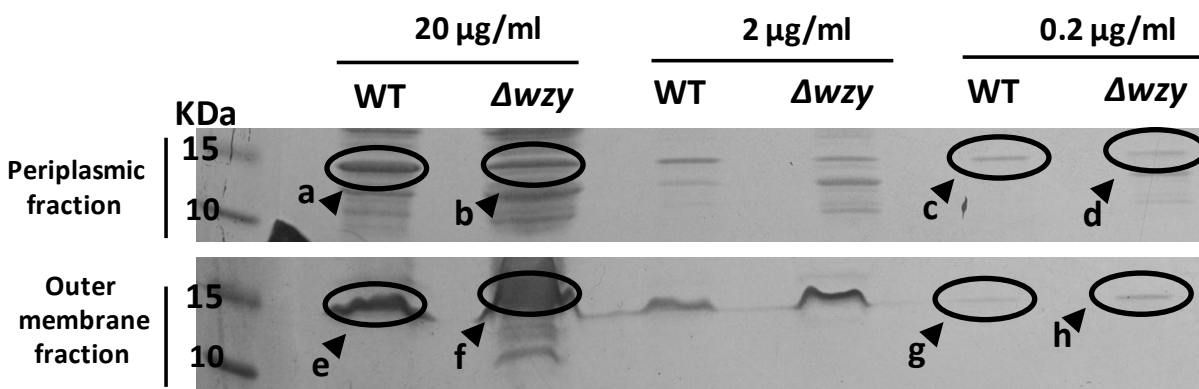

○ : presence of the protein (after Mass spec. analysis)

×: no presence of the protein (after Mass spec. analysis)

**a-h:** ~15 KDa size of protein band in each fraction (All samples were ran in 4-20% gradient gell and stained with Coomasie).

**20  $\mu\text{g/ml}$ :** original protein concentration in sample fractions (calculated by Bradford assay)

**0.2  $\mu\text{g/ml}$ :** 1/100 diluted concentration of sample fractions

**Supplemental Data Figure 2.** Mass spectrometry analysis for purity estimation. The concentrations of periplasmic or outer membrane fraction from wild type or mutant were normalized to 20  $\mu\text{g/ml}$  and 1/100 dilution of normalized fractions (0.2  $\mu\text{g/ml}$ ) were prepared. In order to determine whether the specific proteins in the diluted samples can still be identified, both the diluted and undiluted samples were analyzed by SDS-PAGE and a 15KDa band in each fraction was further analyzed by Mass spectrometry. Based on this analysis, the fractions we are investigating have at least 99% purity because a fraction specific protein can still be detected in a 1/100 dilution of the membrane fraction yet not be seen in the periplasmic fraction and vice versa. For example, a periplasmic protein 'peroxiredoxin' was detected in the periplasmic fractions from wild type and mutant organisms even at a 1/100 dilution. This protein was not detected in the outer membrane fraction even in the undiluted sample. Therefore the periplasmic fraction is over 99% free of outer membrane.

## References

63. **Woodcock, D. M., Crowther, P. J., Doherty, J., Jefferson, S., DeCruz, E., Noyer-Weidner, M., Smith, S. S., Michael, M. Z., and Graham, M. W.** (1989) *Nucleic Acids Res* **17**, 3469-3478
64. **Hoang, T. T., Karkhoff-Schweizer, R. R., Kutchma, A. J. and Schweizer, H. P.** (1998) *Gene* **212(1)**, 77-86
65. **Maier, T. M., Having, A., Casey, M., Nano, F. E., Frank, D. W., and Zhart, T. C.** (2004) *Appl Env Microbiol* **70**,7511-7519
66. **Maekawa JA, Abe SM, Kura F, Takahashi T, Watanabe H.** (1999) *FEMS Microbiol Lett* **176**:339-3442
67. **Cha MK, Kim HK, Kim IH.** (1995) *J Biol Chem* **270**: 28635 -28641
68. **Sugawara E, Nikaido H.** (1994) *J Biol Chem* **269**: 17981-17987
69. **Campanacci V, Bishop RE, Blangy S, Tegoni M, Cambillau C.** (2006) *FEBS Lett* **580**: 4877-4883
70. **Huntley JF, Conley P G, Hagman KE, Norgard MV.** (2007) *J Bacteriol* **189**:561-574
